# Supplementary material for: The Evaluation Method of Rock Mass Stability Based on Natural Frequency
Source: Hindawi journal article supplement (doi:10.1155/2021/6652960), 2021-01-01
Supplement: f1 [file 6652960.f1.zip]

Archive with 8 entries (8 files):
- 6652960.f1/VibrationMeterMonitoringData-1.txt
- 6652960.f1/VibrationMeterMonitoringData-2.txt
- 6652960.f1/VibrationMeterMonitoringData-3.txt
- 6652960.f1/VibrationMeterMonitoringData-4.txt
- 6652960.f1/VibrationMeterMonitoringData-5.txt
- 6652960.f1/VibrationMeterMonitoringData-6.txt
- 6652960.f1/VibrationMeterMonitoringData-7.txt
- 6652960.f1/VibrationMeterMonitoringData-8.txt
